# Supplementary material
Source: MDPI journal article supplement (https://www.mdpi.com/2073-4441/14/23/3844)

## Supplemental materials

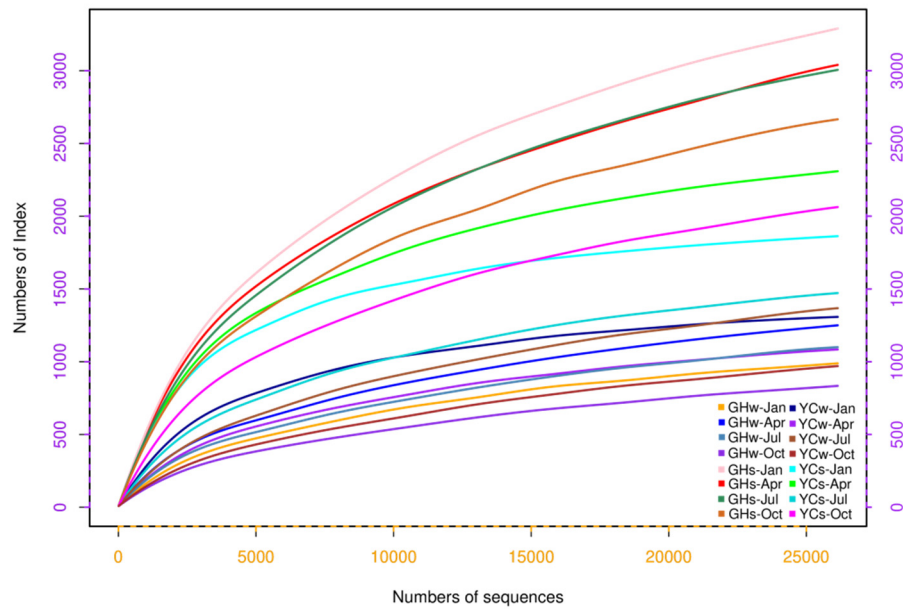

**Figure S1.** Rarefaction curves of all samples.

Supplement: s1 [file s1 › water-1996941-supplementary.pdf]
